# Supplementary material for: Poly(Lactic Acid)/Graphite Nanoplatelet Nanocomposite Filaments for Ligament Scaffolds
Source: MDPI journal article supplement (doi:10.3390/nano11112796), 2021-10-22
Supplement: s1 [file s1]

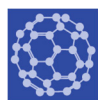

# Poly(Lactic Acid)/Graphite Nanoplatelet Nanocomposite Filaments for Ligament Scaffolds

Magda Silva <sup>1,2,3</sup>, Carina Gomes <sup>3</sup>, Isabel Pinho <sup>3</sup>, Hugo Gonçalves <sup>3</sup>, Ana C. Vale <sup>1,2</sup>, José A. Covas <sup>3</sup>, Natália M. Alves <sup>1,2,\*</sup> and Maria C. Paiva <sup>3,\*</sup>

<sup>1</sup> 3B's Research Group, I3Bs—Research Institute on Biomaterials, Biodegradables and Biomimetics, University of Minho Headquarters of the European Institute of Excellence on Tissue Engineering and Regenerative Medicine, Avepark, Barco, 4805-017 Guimarães, Portugal; magda.sof.g.silva@gmail.com (M.S.); cat.cvale@gmail.com (A.C.V.); [nalves@i3bs.uminho.pt](mailto:nalves@i3bs.uminho.pt) (N.M.A.)

<sup>2</sup> ICVS/3B's, Associate PT Government Laboratory, 4710-057 Braga/4805-017 Guimarães, Portugal

<sup>3</sup> Department of Polymer Engineering, Institute for Polymers and Composites, University of Minho, 4800-058 Guimarães, Portugal; carinagomes.96@hotmail.com (C.G.); [pg38948@alunos.uminho.pt](mailto:pg38948@alunos.uminho.pt) (I.P.); [hugosousagoncalves@protonmail.com](mailto:hugosousagoncalves@protonmail.com) (H.G.); [jcovas@dep.uminho.pt](mailto:jcovas@dep.uminho.pt) (J.A.C.)

\* Correspondence: [nalves@i3bs.uminho.pt](mailto:nalves@i3bs.uminho.pt) (N.M.A.); [mcpaiva@dep.uminho.pt](mailto:mcpaiva@dep.uminho.pt) (M.C.P.)

## 1. Supplementary Information

### 1.1. Production of filaments

The operating parameters used for the production of the filaments Fil3D and FilText are presented in Table S1.

**Table S1.** Operating parameters used for the production of composite filaments.

| Filament   | Fil3D                                 |                   |                                  |       | FilText                               |                   |                                  |       |
|------------|---------------------------------------|-------------------|----------------------------------|-------|---------------------------------------|-------------------|----------------------------------|-------|
|            | Barrel 1/Barrel 2/Die Temperature(°C) | Screw speed (rpm) | Roll Speed (mm.s <sup>-1</sup> ) |       | Barrel 1/Barrel 2/Die Temperature(°C) | Screw speed (rpm) | Roll Speed (mm.s <sup>-1</sup> ) |       |
|            |                                       |                   | Roll1                            | Roll2 |                                       |                   | Roll1                            | Roll2 |
| PLA        | 130/170/160                           | 45                | 22.8                             | 25.6  | 130/170/160                           | 15                | 232.2                            | 233.6 |
| PLA + 0.25 | 130/170/169                           | 36                | 24.2                             | 25.6  |                                       | 15                | 231.5                            | 234.3 |
| PLA + 0.5  | 130/170/169                           | 36                | 24.9                             | 27.6  |                                       | 15                | 232.2                            | 254.3 |
| PLA + 1    | 135/170/155                           | 45                | 31.1                             | 33.2  | 130/170/160                           | 25                | 228.8                            | 282.7 |
| PLA + 2    | 135/170/155                           | 65                | 30.4                             | 32.5  |                                       | 45                | 228.8                            | 304.8 |
| PLA + 0.25 | 123/170/160                           | 45                | 24.9                             | 28.3  | 123/170/160                           | 25                | 268.9                            | 270.2 |
| PLA + 0.5  | 123/170/160                           | 45                | 25.6                             | 27.6  | 123/170/160                           | 25                | 270.9                            | 272.3 |
| PLA + 1    | 135/170/155                           | 65                | 31.1                             | 34.6  | 130/170/160                           | 45                | 246.7                            | 297.2 |
| PLA + 2    | 135/170/155                           | 65                | 30.4                             | 32.5  | 130/170/160                           | 65                | 228.8                            | 309.6 |
| PLA + 0.25 | 123/170/160                           | 45                | 25.6                             | 27.6  |                                       | 25                | 271.6                            | 273.0 |
| PLA + 0.5  | 123/170/160                           | 45                | 25.6                             | 29.7  |                                       | 25                | 271.6                            | 273.7 |
| PLA + 1    | 125/170/155                           | 65                | 31.1                             | 34.6  | 130/170/160                           | 45                | 246.7                            | 302.7 |
| PLA + 2    | 125/170/155                           | 80                | 29.7                             | 31.8  |                                       | 65                | 228.8                            | 312.4 |

### 1.2. Characterization of functionalized graphite-EDS

EDS tests were performed for [(f-EG)+Ag] to confirm the presence of silver. Figure S1 presents a backscattered electron image of [(f-EG)+Ag] with two different zones (Z1 and Z2) analyzed through EDS and the Ag signal indicates the presence of silver in this graphite, as expected. The C signal is due to graphite, the O signal may be due to residual oxidation of the pristine EG and also to the presence of some benzyl carbamate and the Ag signal indicates the presence of silver in EG, as expected.

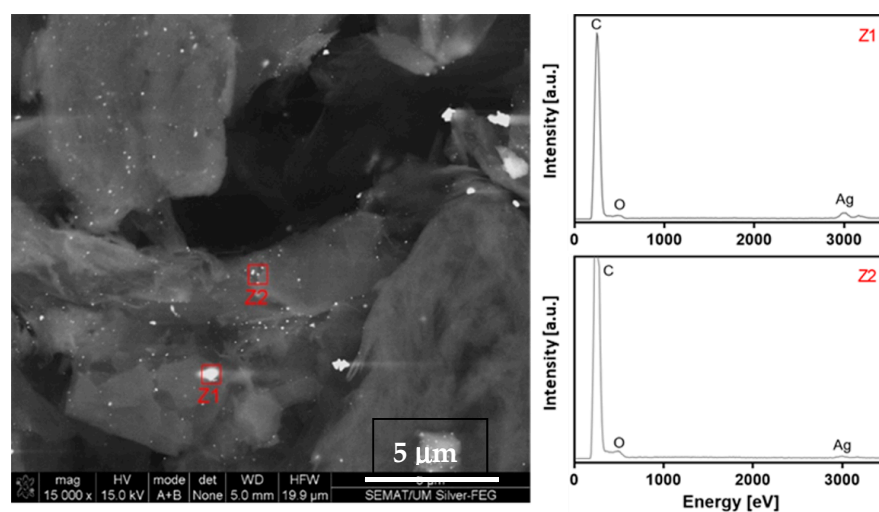

**Figure S1.** SEM image and EDS analysis of [(f-EG) + Ag].

### 1.3. Characterization of the composite filaments-SEM

The images of the cross sections of composite filaments reinforced with EG, f-EG and [(f-EG)+Ag] are displayed in Figures S2 and S3.

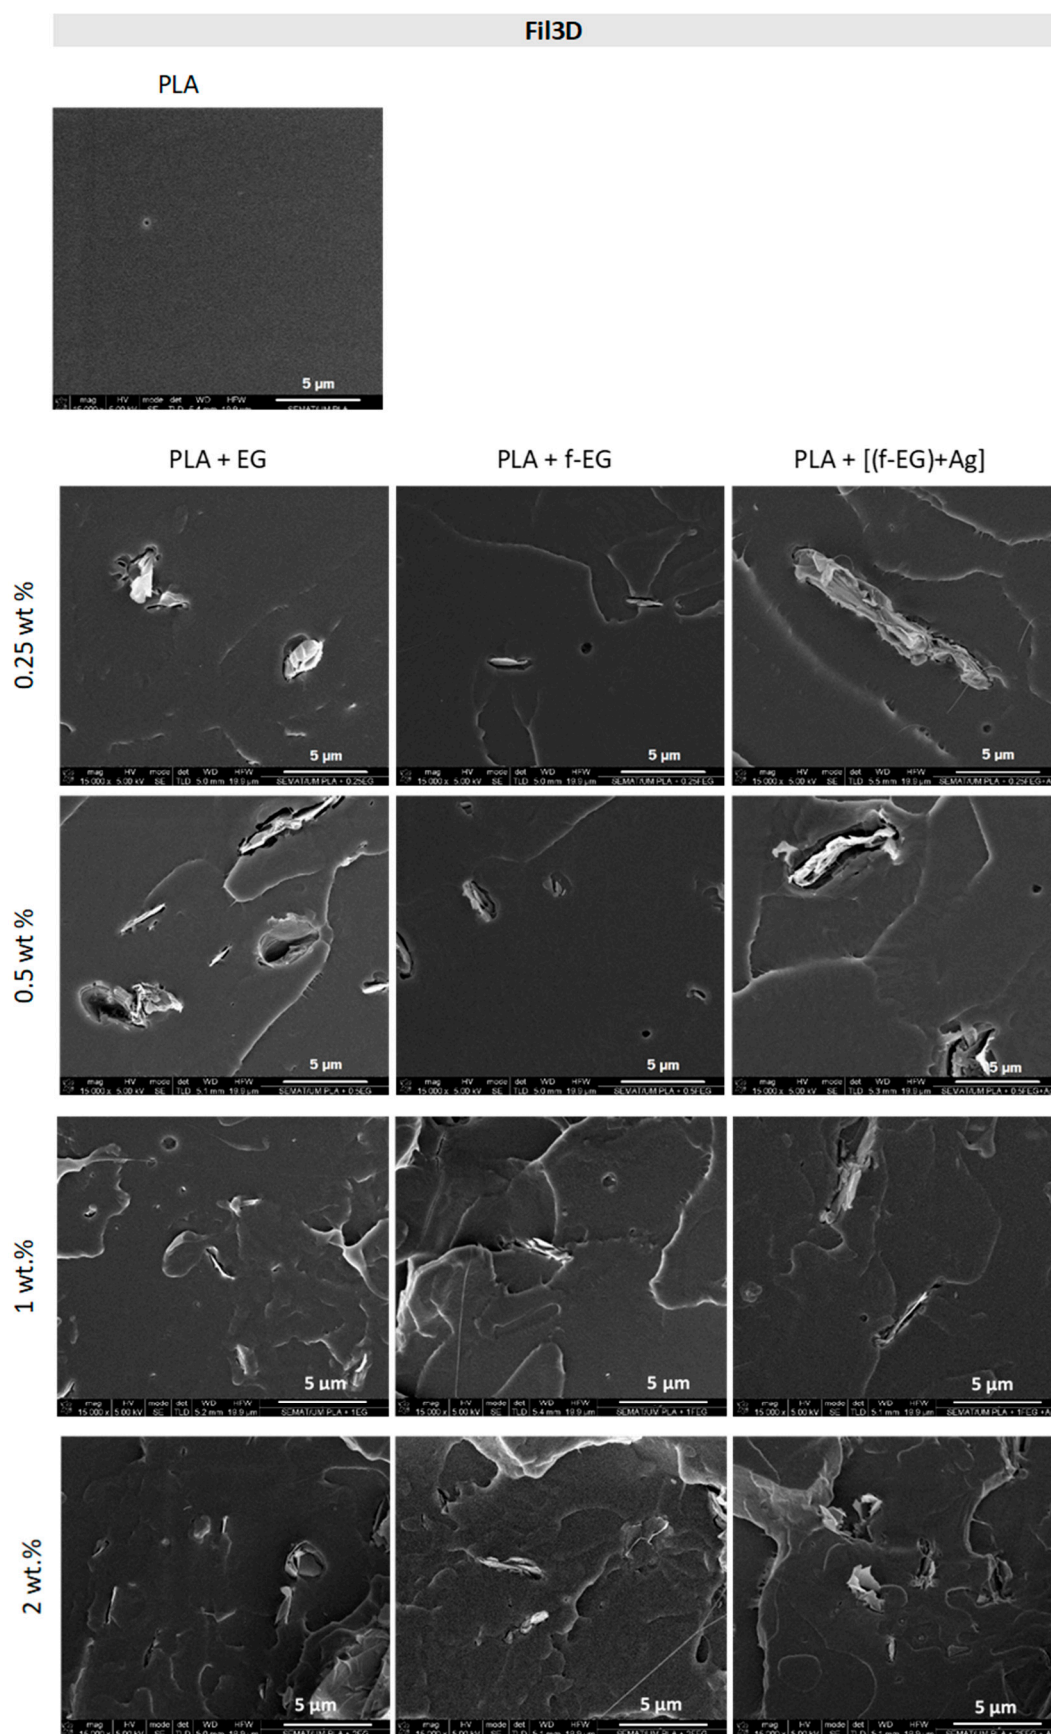

**Figure S2.** SEM images of Fil3D: PLA; PLA reinforced with 0.25, 0.5, 1 and 2 wt.% of EG, f-EG and [(f-EG)+Ag].

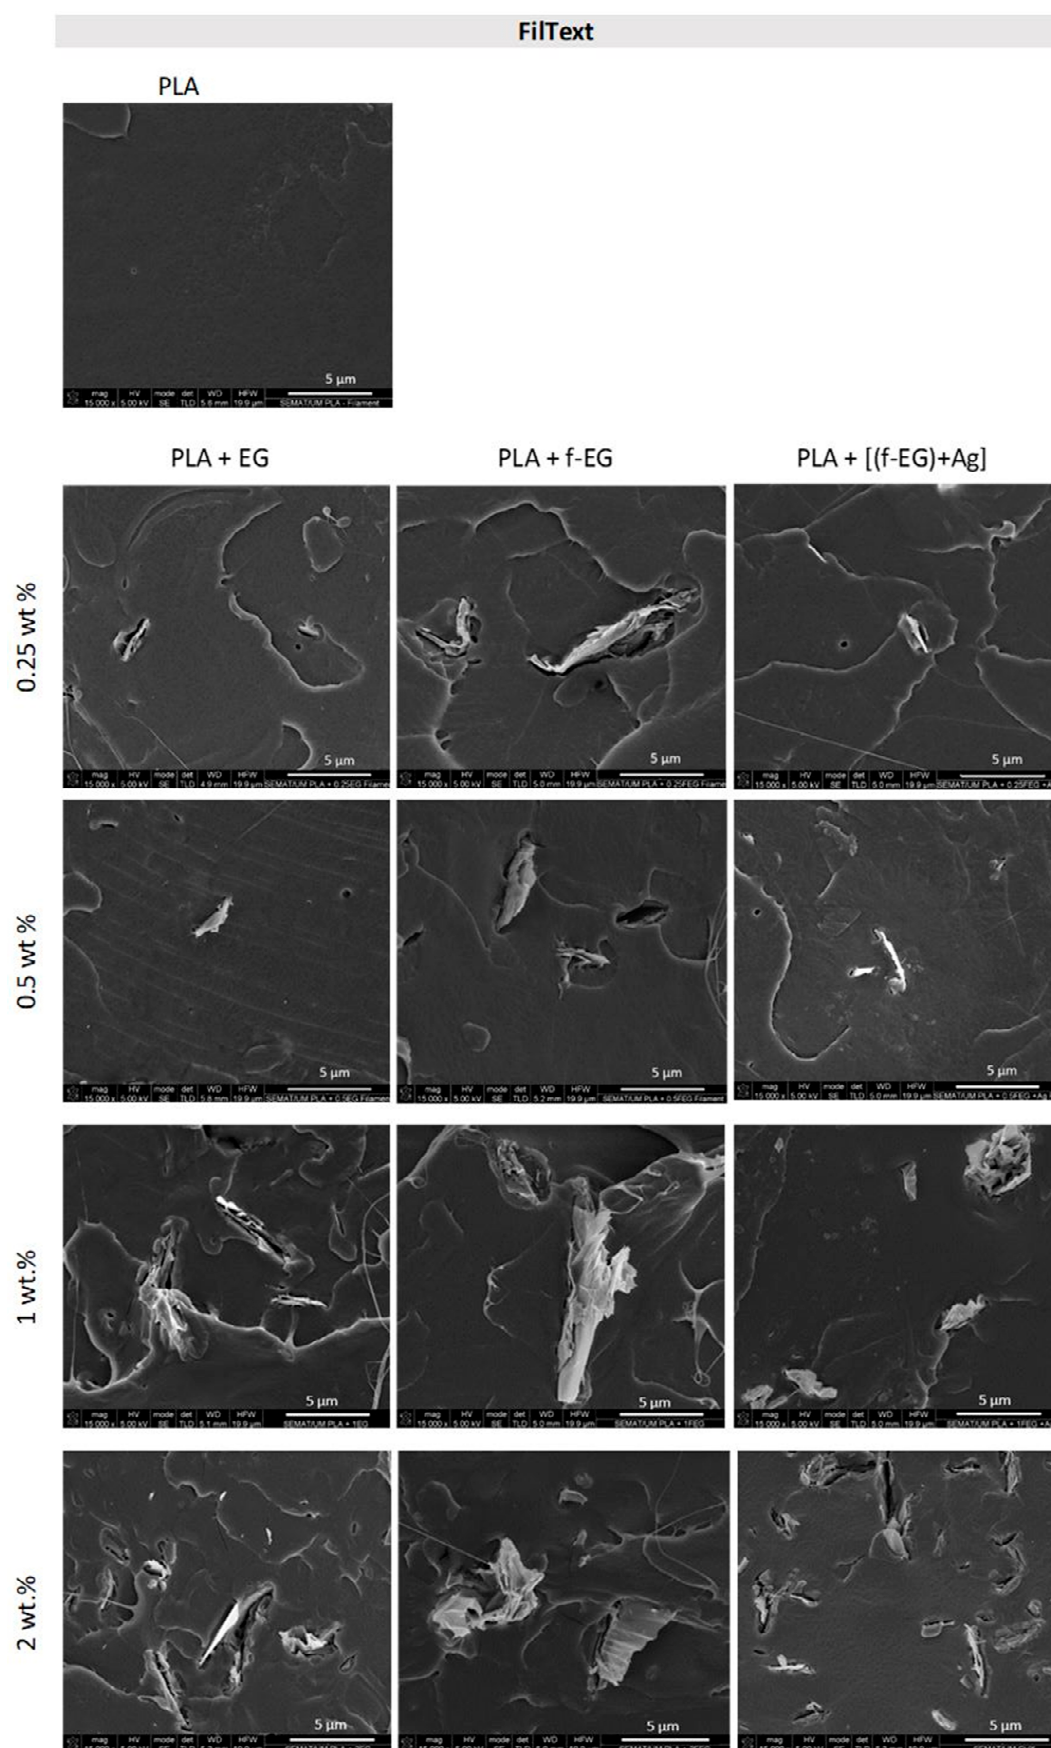

**Figure S3.** SEM images of FilText: PLA; PLA reinforced with 0.25, 0.5, 1 and 2 wt.% of EG, f-EG and [(f-EG)+Ag].



#### 1.4. Characterization of the composite filaments-EDS

EDS tests were performed and confirmed the presence of Ag nanoparticles in Fil3D and FilText reinforced with [(f-EG)+Ag]-see Figure S4.

The SEM images revealed that the polymeric matrix was degraded by the electron beam used to obtain backscattered electron images, however this was necessary to see the silver particles that appear brighter in the image. The C signal is due to the graphite and the polymeric matrix, the O signal may appear mainly due to the presence of PLA, gold (Au) signal refers to the deposition that was made in the sample for the SEM analysis and, finally, the Ag signal indicates the presence of silver in the composite filaments, as expected.

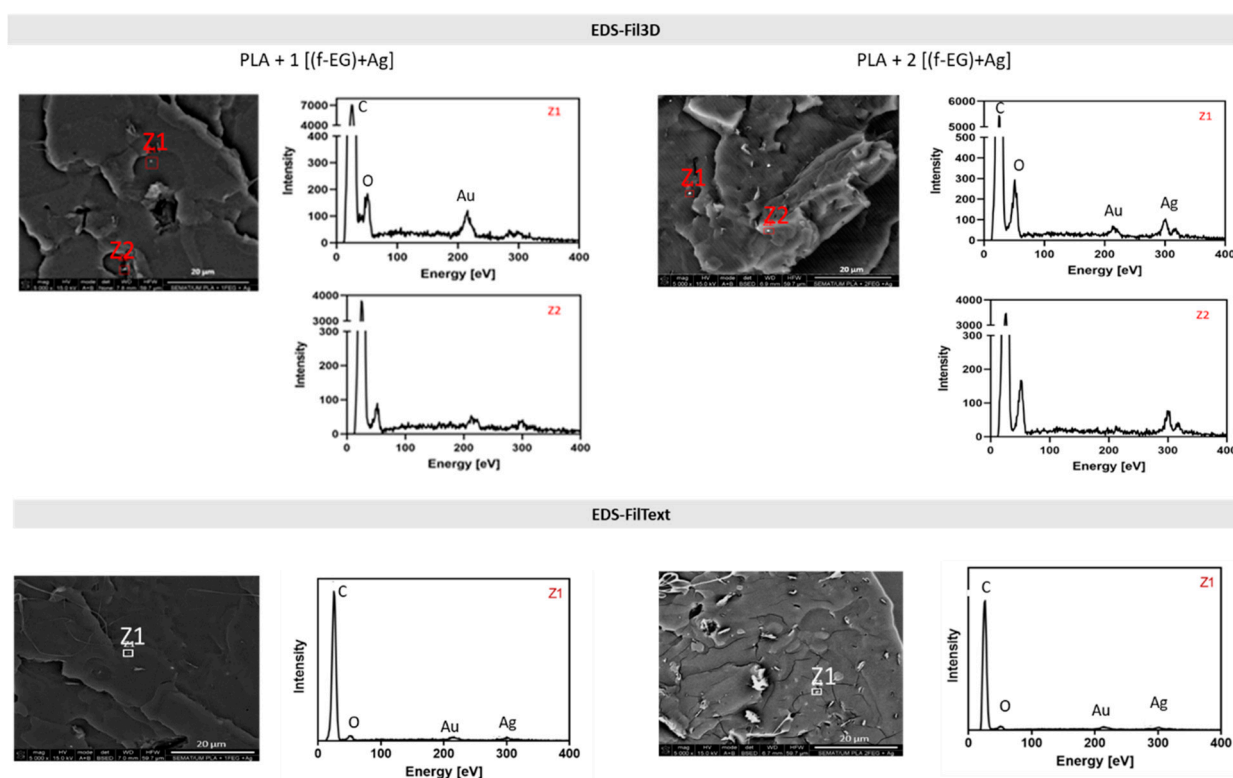

**Figure S4.** SEM images and EDS analysis of Fil3D and FilText reinforced with 1 and 2wt.% of [(f-EG)+Ag].

#### 1.5. Characterization of the composite filaments-OM

OM images of the composite filament cross sections with different loads of EG, f-EG and [(f-EG)+Ag] are displayed in Figures S5 and S6.

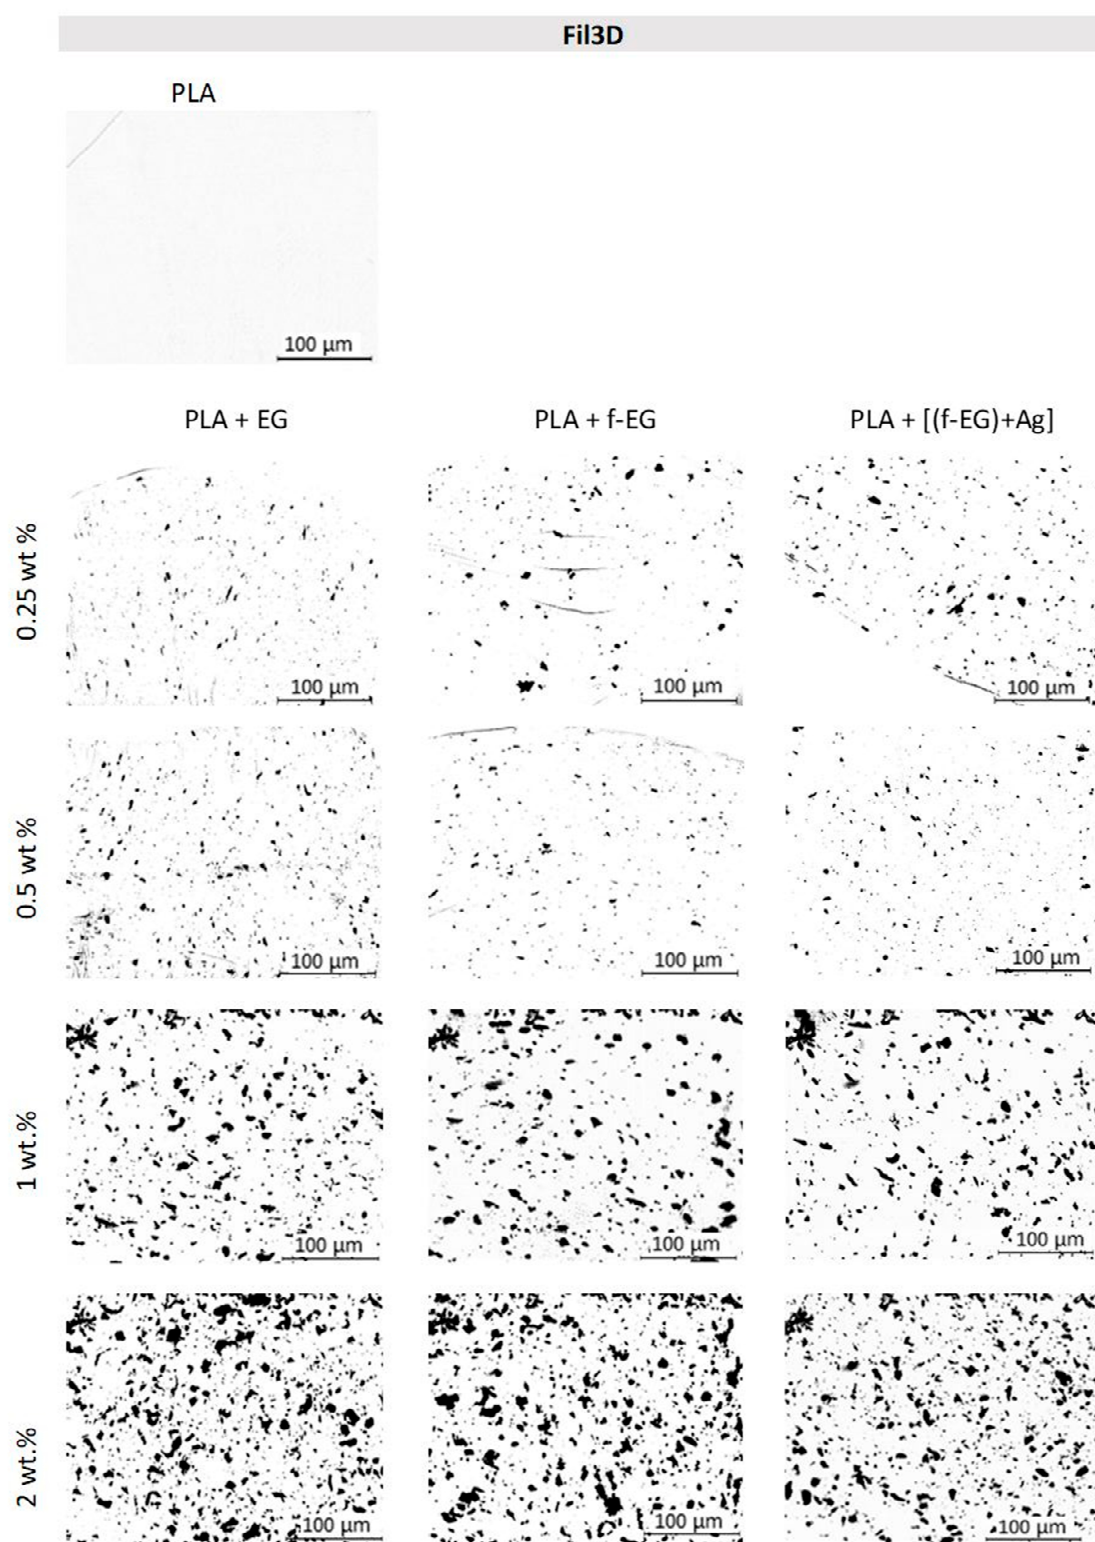

**Figure S5.** Optical microscopy images of the Fil3D's cross-section, namely PLA; PLA reinforced with 0.25, 0.5, 1 and 2 wt.% of EG, f-EG and [(f-EG)+Ag].

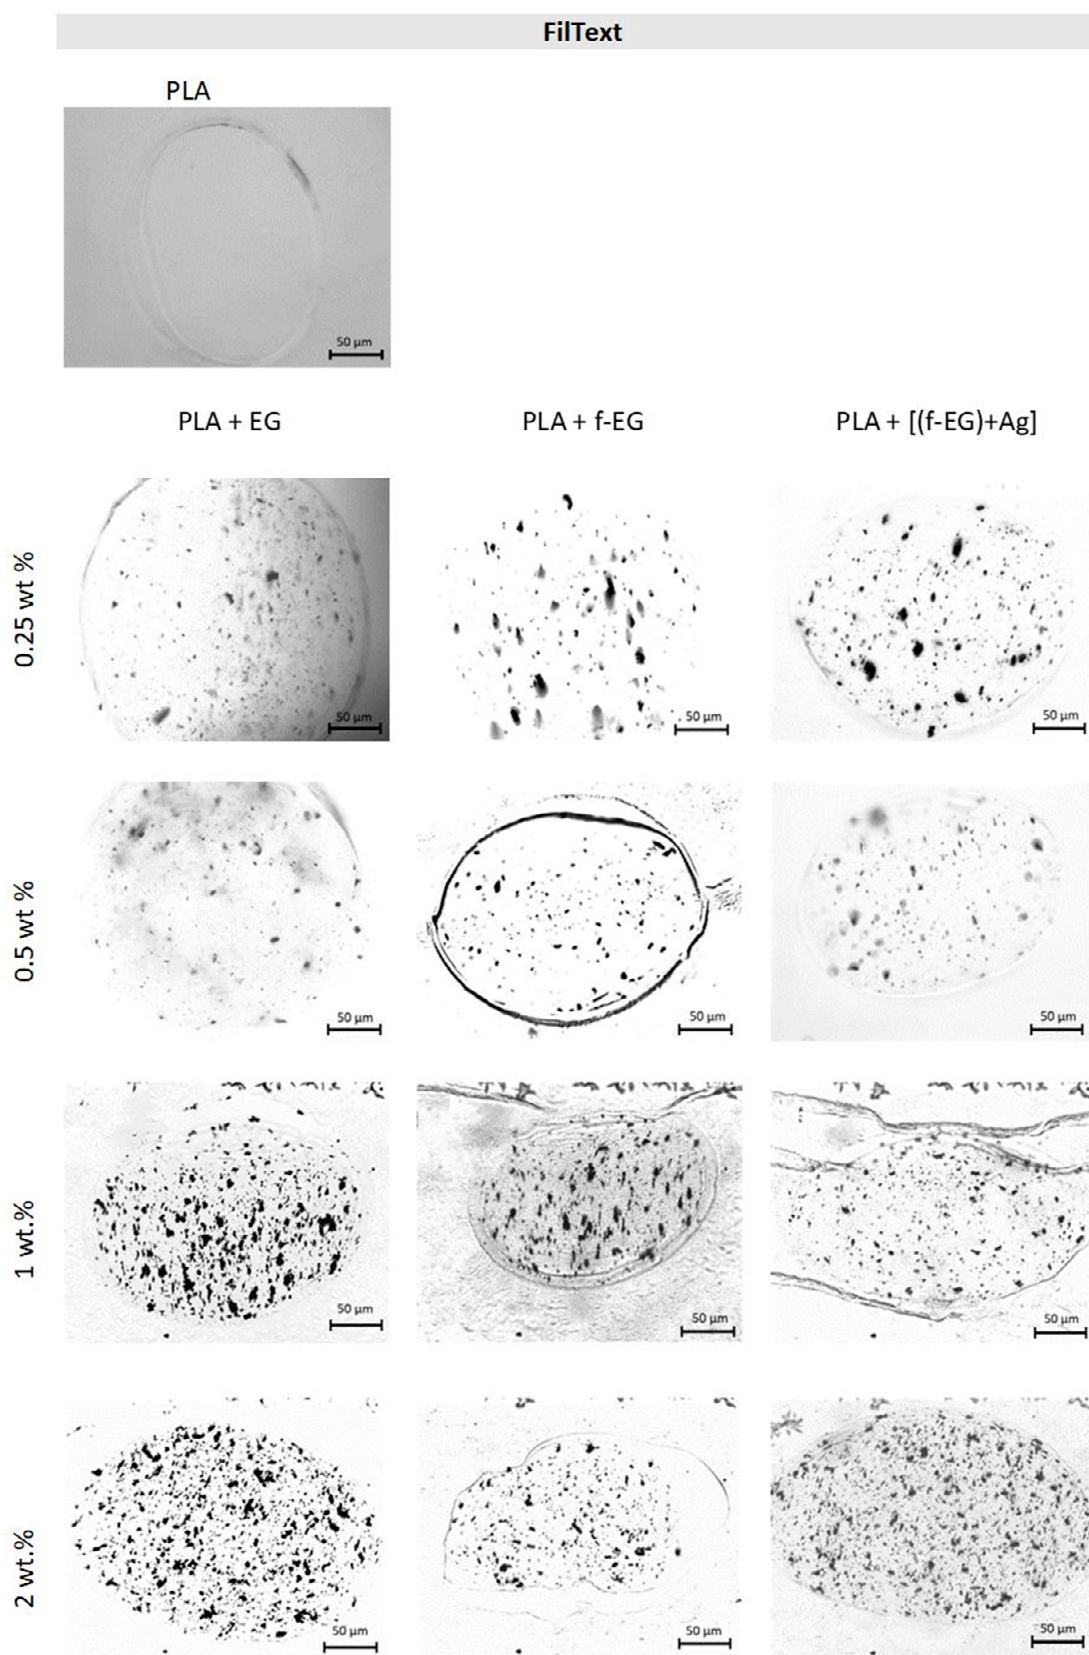

**Figure S6.** Optical microscopy images of the FilText's cross-section, namely PLA; PLA reinforced with 0.25, 0.5, 1 and 2 wt.% of EG, f-EG and [(f-EG)+Ag].

#### 1.6. Characterization of the composite filaments-DSC

The relevant thermal characteristics  $T_g$ ,  $T_c$ ,  $T_m$ ,  $\Delta H_m$ ,  $\Delta H_c$ , and  $\chi_c$ , of each composition obtained for the first and second heating scans are reported in Tables S2 and S3, respectively.

**Table S2.** Summary of the thermal properties of Fil3D and FilText obtained for the 1st heating.

| Filament   | $T_g$ (°C) |         | $T_c$ (°C) |         | $T_m$ (°C) |         | $\Delta H_c$ (J/g) |         | $\Delta H_m$ (J/g) |         | $\chi_c$ (%) |         |
|------------|------------|---------|------------|---------|------------|---------|--------------------|---------|--------------------|---------|--------------|---------|
|            | Fil3D      | FilText | Fil3D      | FilText | Fil3D      | FilText | Fil3D              | FilText | Fil3D              | FilText | Fil3D        | FilText |
| PLA        | 57.5       | 59.2    | 110.2      | 104.1   | 161.9      | 159.6   | 30.1               | 28.9    | 33.6               | 29.7    | 3.7          | 0.9     |
| PLA + 0.25 | 57.7       | 59.8    | 108.9      | 102.8   | 161.7      | 158.8   | 29.4               | 28.3    | 31.6               | 29.7    | 2.4          | 1.5     |
| PLA + 0.5  | 58.3       | 59.4    | 109.3      | 104.2   | 161.7      | 158.8   | 28.6               | 27.0    | 30.8               | 28.1    | 2.4          | 1.2     |
| PLA + 1    | 54.7       | 61.9    | 117.7      | 111.3   | 162.5      | 160.7   | 30.0               | 30.8    | 35.8               | 31.4    | 6.3          | 0.6     |
| PLA + 2    | 55.8       | 55.7    | 103.6      | 107.2   | 161.6      | 160.7   | 26.0               | 30.4    | 31.6               | 30.6    | 6.1          | 0.2     |
| PLA + 0.25 | 58.3       | 59.5    | 109.2      | 103.4   | 161.7      | 158.6   | 29.4               | 27.6    | 32.0               | 28.6    | 2.7          | 1.1     |
| PLA + 0.5  | 58.2       | 59.2    | 108.4      | 105.3   | 161.9      | 159.2   | 28.2               | 30.4    | 31.2               | 31.0    | 2.4          | 0.7     |
| PLA + 1    | 55.2       | 56.3    | 112.2      | 110.1   | 162.2      | 161.0   | 28.2               | 28.3    | 32.9               | 28.7    | 6.3          | 0.4     |
| PLA + 2    | 56.4       | 57.0    | 105.0      | 107.8   | 161.9      | 161.1   | 27.1               | 28.8    | 35.5               | 29.0    | 6.1          | 0.2     |
| PLA + 0.25 | 58.9       | 59.8    | 108.9      | 103.6   | 161.7      | 159.2   | 29.7               | 25.5    | 32.7               | 26.9    | 3.3          | 1.5     |
| PLA + 0.5  | 59.4       | 59.7    | 109.4      | 104.1   | 161.8      | 159.6   | 30.4               | 25.4    | 32.5               | 26.8    | 2.4          | 1.5     |
| PLA + 1    | 55.6       | 54.6    | 108.1      | 112.1   | 162.3      | 161.0   | 29.3               | 29.1    | 33.7               | 29.5    | 6.3          | 0.5     |
| PLA + 2    | 57.1       | 55.2    | 107.5      | 107.5   | 161.6      | 160.8   | 27.2               | 26.5    | 34.5               | 26.8    | 6.1          | 0.3     |

**Table S3.** Summary of the thermal properties of Fil3D and FilText obtained for the 2nd heating.

| Filament   | $T_g$ (°C) |         | $T_c$ (°C) |         | $T_m$ (°C) |         | $\Delta H_c$ (J/g) |         | $\Delta H_m$ (J/g) |         | $\chi_c$ (%) |         |
|------------|------------|---------|------------|---------|------------|---------|--------------------|---------|--------------------|---------|--------------|---------|
|            | Fil3D      | FilText | Fil3D      | FilText | Fil3D      | FilText | Fil3D              | FilText | Fil3D              | FilText | Fil3D        | FilText |
| PLA        | 60.2       | 58.5    | 113        | 105     | 161        | 160     | 31.9               | 30.2    | 34.7               | 31.5    | 3.0          | 1.4     |
| PLA + 0.25 | 60.7       | 58.8    | 117        | 112     | 158        | 159     | 31.2               | 30.7    | 33.7               | 31.7    | 2.6          | 1.1     |
| PLA + 0.5  | 60.7       | 58.4    | 118        | 113     | 155        | 159     | 28.0               | 30.7    | 32.5               | 31.4    | 4.7          | 0.8     |
| PLA + 1    | 59.0       | 58.7    | 116        | 112     | 161        | 161     | 30.3               | 29.3    | 37.5               | 31.6    | 7.8          | 2.6     |
| PLA + 2    | 59.0       | 52.0    | 121        | 117     | 156        | 161     | 29.3               | 18.3    | 36.0               | 31.6    | 7.3          | 14.5    |
| PLA + 0.25 | 60.8       | 58.9    | 121        | 117     | 156        | 157     | 29.8               | 28.7    | 34.1               | 31.0    | 4.7          | 2.4     |
| PLA + 0.5  | 60.9       | 59.1    | 119        | 118     | 156        | 156     | 29.3               | 32.6    | 32.9               | 33.6    | 3.9          | 1.1     |
| PLA + 1    | 59.0       | 59.1    | 118        | 114     | 161        | 161     | 29.9               | 26.2    | 35.6               | 28.6    | 6.3          | 2.6     |
| PLA + 2    | 59.0       | 58.8    | 116        | 111     | 161        | 161     | 33.0               | 19.4    | 35.9               | 28.9    | 3.2          | 10.3    |
| PLA + 0.25 | 60.7       | 60.1    | 124        | 118     | 157        | 156     | 28.9               | 30.6    | 31.6               | 32.1    | 3.0          | 1.7     |
| PLA + 0.5  | 60.7       | 59.6    | 123        | 119     | 157        | 154     | 30.9               | 26.7    | 32.3               | 30.5    | 1.5          | 4.1     |
| PLA + 1    | 59.0       | 60.4    | 117        | 116     | 161        | 161     | 33.1               | 23.4    | 35.7               | 30.0    | 2.8          | 7.1     |
| PLA + 2    | 59.2       | 58.8    | 115        | 113     | 161        | 161     | 31.1               | 18.9    | 35.8               | 26.5    | 5.1          | 8.3     |

### 1.7. Characterization of the composite filaments-biodegradation

PLA and all the composite filaments were immersed in a PBS solution at 37 °C, during 7, 14, 21 and 28 days. The obtained results are detailed in Table S4.

**Table S4.** Weight loss (%) of Fil3D and FilText.

| Filament | Weight loss (%) |         |           |         |           |         |           |         |
|----------|-----------------|---------|-----------|---------|-----------|---------|-----------|---------|
|          | 0-7days         |         | 0-14 days |         | 0-21 days |         | 0-28 days |         |
|          | Fil3D           | FilText | Fil3D     | FilText | Fil3D     | FilText | Fil3D     | FilText |
| PLA      | 0.00            | 0.00    | 0.00      | 0.00    | 0.00      | 0.00    | 0.00      | 0.00    |
| PLA+0.25 | 0.00            | 0.00    | 0.00      | 0.00    | 0.00      | 0.00    | 0.00      | 0.00    |
| PLA+0.5  | 0.00            | 0.00    | 0.00      | 0.00    | 0.00      | 0.00    | 1.39      | 0.00    |
| PLA+0.25 | 0.00            | 0.00    | 0.00      | 0.00    | 0.00      | 0.00    | 0.00      | 0.00    |
| PLA+0.5  | 0.00            | 0.00    | 1.37      | 0.00    | 0.00      | 0.00    | 0.00      | 0.00    |
| PLA+0.25 | 0.00            | 0.00    | 1.32      | 0.00    | 0.00      | 0.00    | 0.00      | 0.00    |
| PLA+0.5  | 0.00            | 0.00    | 1.24      | 0.00    | 0.00      | 0.00    | 0.00      | 0.00    |
